# Supplementary material
Source: Royal Society of Chemistry journal article supplement (doi:10.1039/d5mh02144h)
Supplement: d5mh02144h1.pdf [file d5mh02144h1.pdf]

## Supplementary Information for

# High-performance transparent metal mesh electrodes utilizing a metal-vapor-desorption layer for organic light-emitting diode applications

*Dahyun Kim<sup>1,2</sup>, Sujin Jeong<sup>1,2</sup>, Dong Keon Lee<sup>1,2</sup>, Wonjune Yi<sup>1,2</sup>, Hyungsoo Yoon<sup>1,2</sup>, Joohee Jeon<sup>1,2</sup>, Hayun Kim<sup>1,2</sup>, Byeongmoon Lee<sup>3\*</sup>, and Yongtaek Hong<sup>1,2\*</sup>*

<sup>1</sup>Department of Electrical and Computer Engineering, Seoul National University, Seoul 08826, Korea

<sup>2</sup>Inter-university Semiconductor Research Center (ISRC), Seoul National University, Seoul 08826, Korea

<sup>3</sup>Department of Electrical Engineering and Computer Science, Daegu Gyeongbuk Institute of Science and Technology (DGIST), Daegu 42988, Korea

KEYWORDS: transparent electrodes, selective deposition, transfer printing, organic light-emitting diodes (OLEDs), metal-vapor-desorption layer

## Supplementary Information

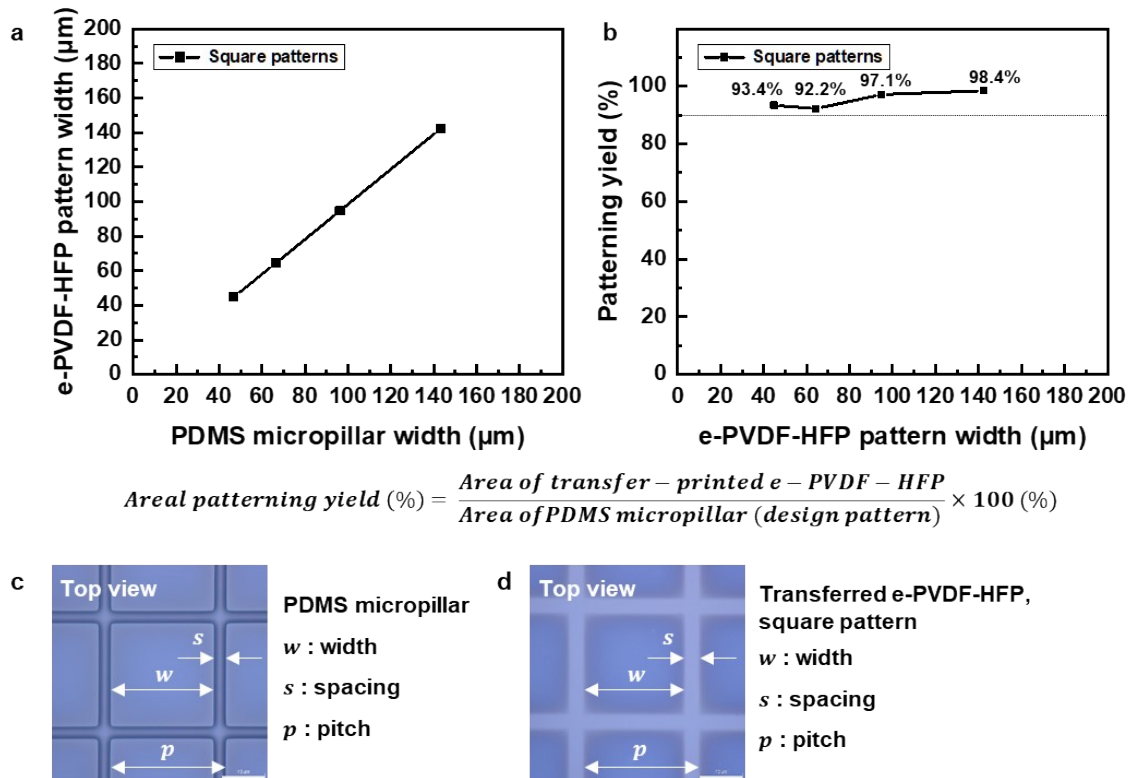

Figure S1. Transfer printing of e-PVDF-HFP pattern (a) square pattern width of PDMS micropillar stamp and corresponding square pattern width of transferred e-PVDF-HFP (b) areal patterning yield of square patterns with different e-PVDF-HFP pattern widths. (c) Optical images representing the width, spacing, and pitch of the PDMS micropillar stamp and (d) transferred e-PVDF-HFP pattern

Table S1. Detailed data of the width, spacing, and pitch of the PDMS micropillar stamp and the corresponding width, spacing, and pitch of transferred e-PVDF-HFP pattern, and the calculated areal patterning yield of each square pattern

| No. | PDMS micropillar        |                           |                         | Transferred e-PVDF-HFP film, square pattern [ $\mu\text{m}$ ] |                           |                         | Areal patterning yield (%) |
|-----|-------------------------|---------------------------|-------------------------|---------------------------------------------------------------|---------------------------|-------------------------|----------------------------|
|     | Width [ $\mu\text{m}$ ] | Spacing [ $\mu\text{m}$ ] | Pitch [ $\mu\text{m}$ ] | Width [ $\mu\text{m}$ ]                                       | Spacing [ $\mu\text{m}$ ] | Pitch [ $\mu\text{m}$ ] |                            |
| 1   | 46.8                    | 11.7                      | 58.5                    | 44.8                                                          | 14.8                      | 59.6                    | 93.3711%                   |
| 2   | 66.4                    | 11.7                      | 78.1                    | 64.4                                                          | 14.4                      | 78.9                    | 92.2094%                   |
| 3   | 96.2                    | 11.8                      | 108.0                   | 94.7                                                          | 12.9                      | 107.7                   | 97.1144%                   |
| 4   | 143.2                   | 12.0                      | 155.2                   | 142.3                                                         | 14.6                      | 156.9                   | 98.4169%                   |

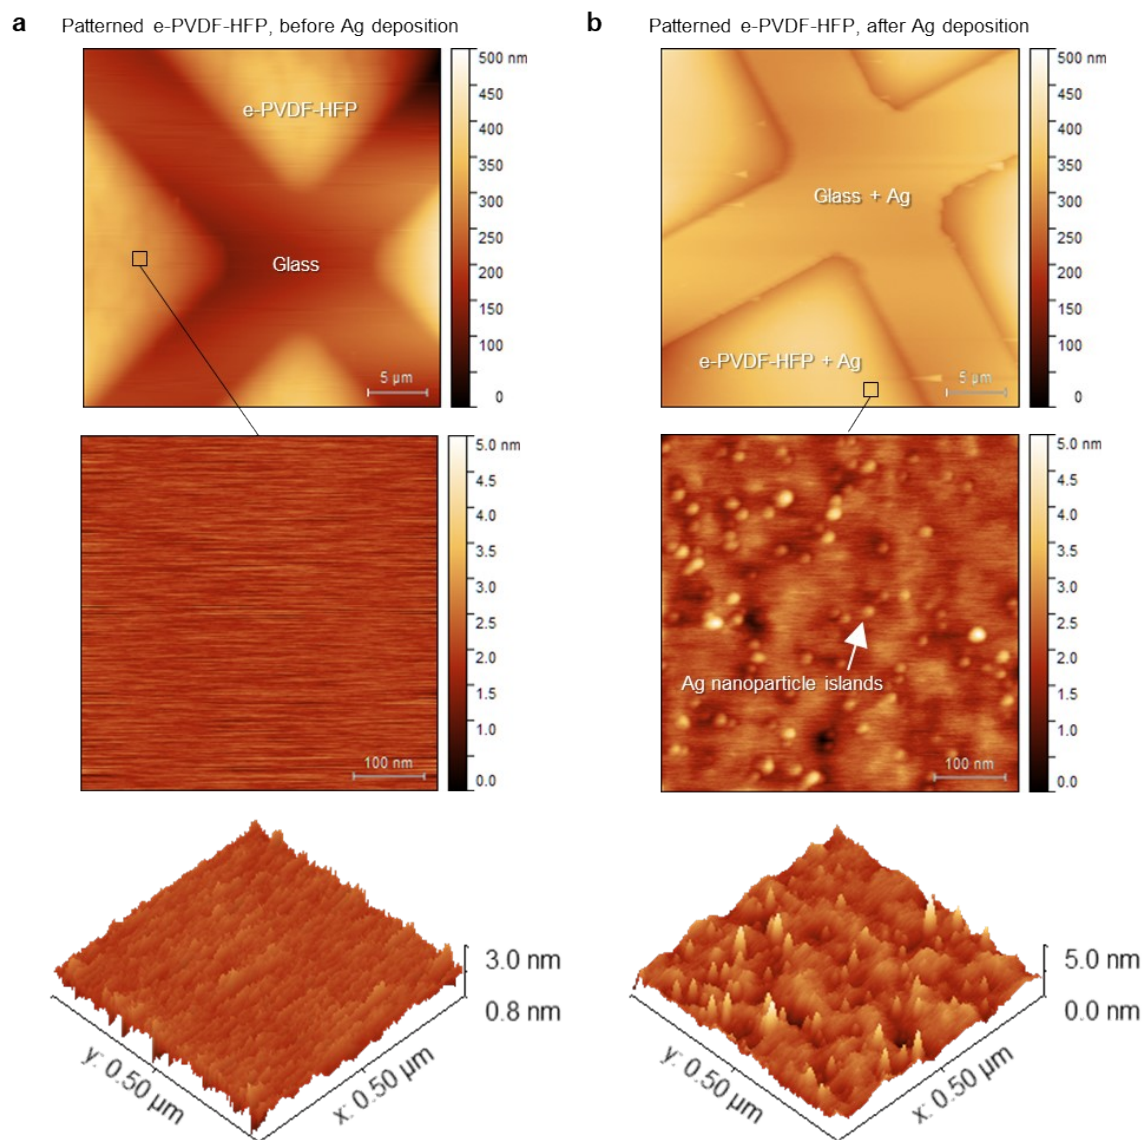

Figure S2. AFM images of fabricated metal mesh electrodes on glass substrate (a) before and (b) after Ag (100 nm) deposition.

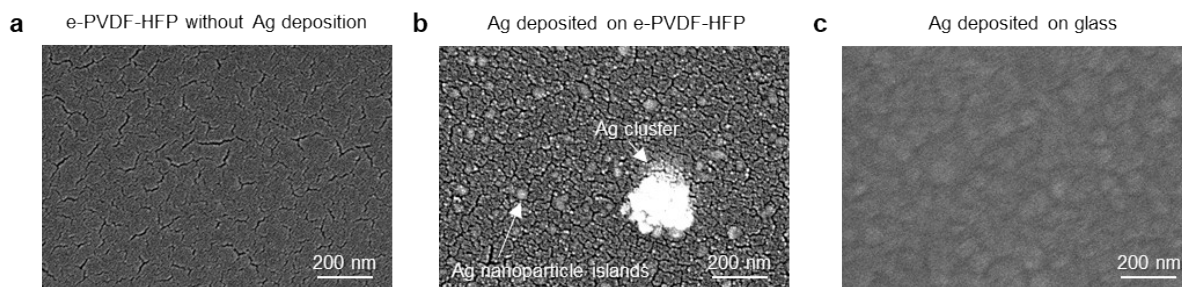

Figure S3. FE-SEM images of (a) e-PVDF-HFP without Ag deposition, (b) Ag (300 nm) deposited on e-PVDF-HFP and (c) on glass substrate.

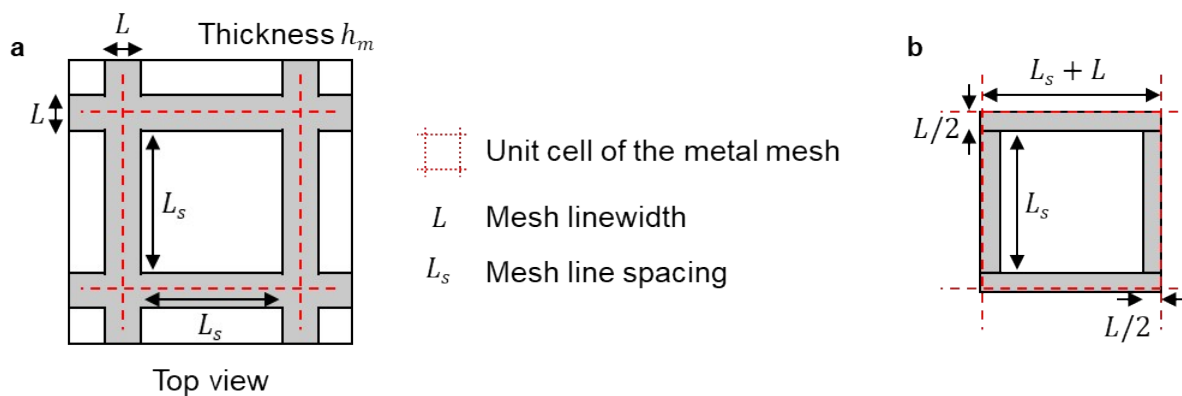

Figure S4. Schematic image representing (a) the geometrical parameters of the metal mesh electrode and (b) the parameters used for calculation based on a unit cell of the metal mesh electrode

## Supplementary Note 1. Theoretical analysis of the FoM

Theoretical analysis of the FoM based on the idealized calculation of the transmittance and the sheet resistance of mesh-patterned metal films were derived as follows. Here, The sheet resistance was calculated following the analytical framework reported in the previous report<sup>1</sup>, also 100% transmittance in the e-PVDF-HFP region and 0% transmittance in the metal mesh region were assumed. The metal mesh is assumed to be perfectly periodic, as illustrated in Figure S4.

Based on Ohm's law and from its geometry, the ideal sheet resistance ( $R_s$ ) and transmittance ( $T$ ) of the metal mesh can be theoretically written as follows,

$$R_s = \xi \frac{\rho}{h_m} \left( \frac{L}{L_s + L} + \frac{L_s}{L} \right)$$

$$T = \left( \frac{L_s}{L_s + L} \right)^2 = \left( \frac{1}{1 + (L/L_s)} \right)^2$$

where  $\rho$  and  $h_m$  are the resistivity and thickness of the metal film, respectively.  $\xi$  is a correlation factor, which can be determined experimentally.  $L$  and  $L_s$  are the mesh linewidth and line spacing, respectively. (Figure S4)

Overall, FoM<sup>2-5</sup> for the transparent conducting electrodes can be calculated using the results above as follows. It is noted that as  $L$  decreases or  $L_s$  widens, the FoM is expected to increase.

$$FoM = \frac{188.5}{R_s (T^{-1/2} - 1)} = \frac{188.5 h_m}{\xi \rho} \left( \frac{\left(\frac{L}{L_s}\right)^2}{\left(1 + \frac{L}{L_s}\right)} + 1 \right)^{-1}$$

## References

- [1] D. S. Ghosh, T. L. Chen and V. Pruneri, *Appl. Phys. Lett.*, 2010, **96**, 041109.
- [2] M. Dressel and G. Gruner, *Electrodynamics of Solids: Optical Properties of Electrons in Matter*, Cambridge University Press, Cambridge, 2002.
- [3] L. Hu, D. S. Hecht and G. Grüner, *Nano Letters*, 2004, **4**, 2513-2517.
- [4] S. De and J. N. Coleman, *ACS Nano*, 2010, **4**, 2713.
- [5] Á. Pekker and K. Kamarás, *Journal of Applied Physics*, 2010, **108**, 054318.

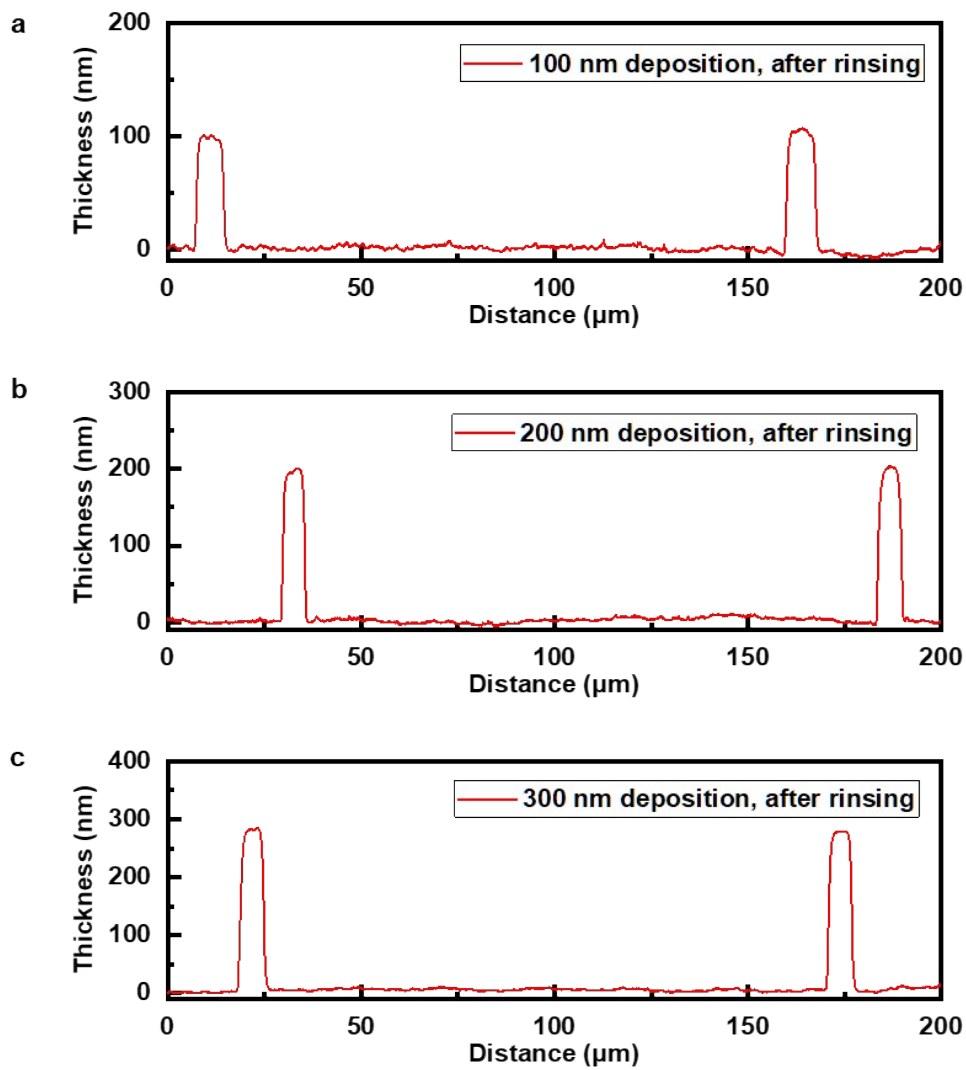

Figure S5. Surface profiles of fabricated metal mesh electrodes on glass substrate, measured after removing e-PVDF-HFP patterns by rinsing. Ag deposition thickness of (a) 100 nm, (b) 200 nm, and (c) 300 nm. The surface profiles were measured using a stylus profilometer (DektakXT-A, Bruker).

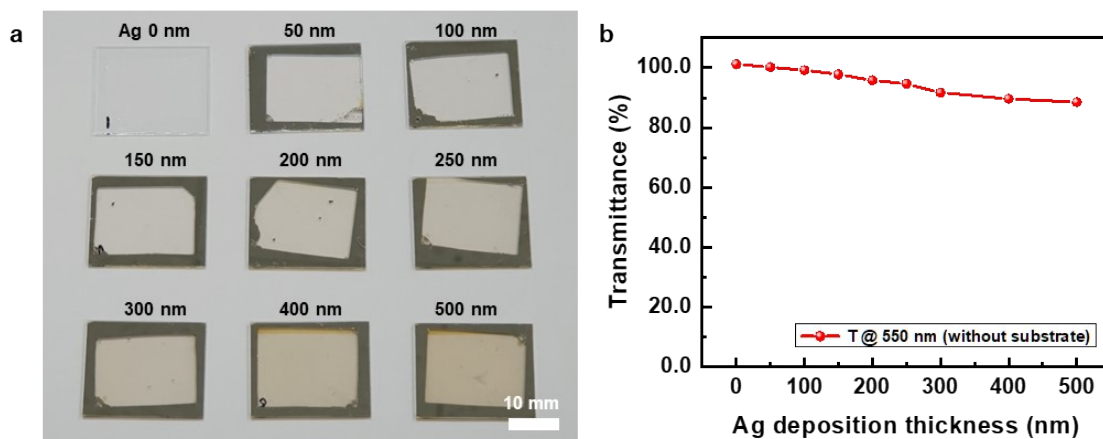

Figure S6. (a) Photographs of non-patterned e-PVDF-HFP films transferred to a glass substrate, with different Ag deposition thicknesses. (b) Measured transmittance (at 550 nm) of non-patterned e-PVDF-HFP films transferred to a glass substrate, with different Ag deposition thicknesses.

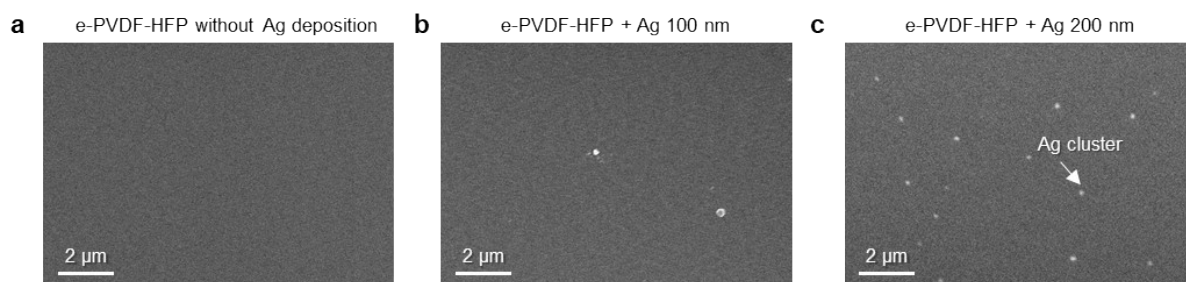

Figure S7. FE-SEM images of e-PVDF-HFP with different Ag deposition thicknesses, indicating increased growth of Ag clusters as Ag deposition thicknesses increased. (a) 0 nm (without Ag deposition), (b) 100 nm, and (c) 200 nm.

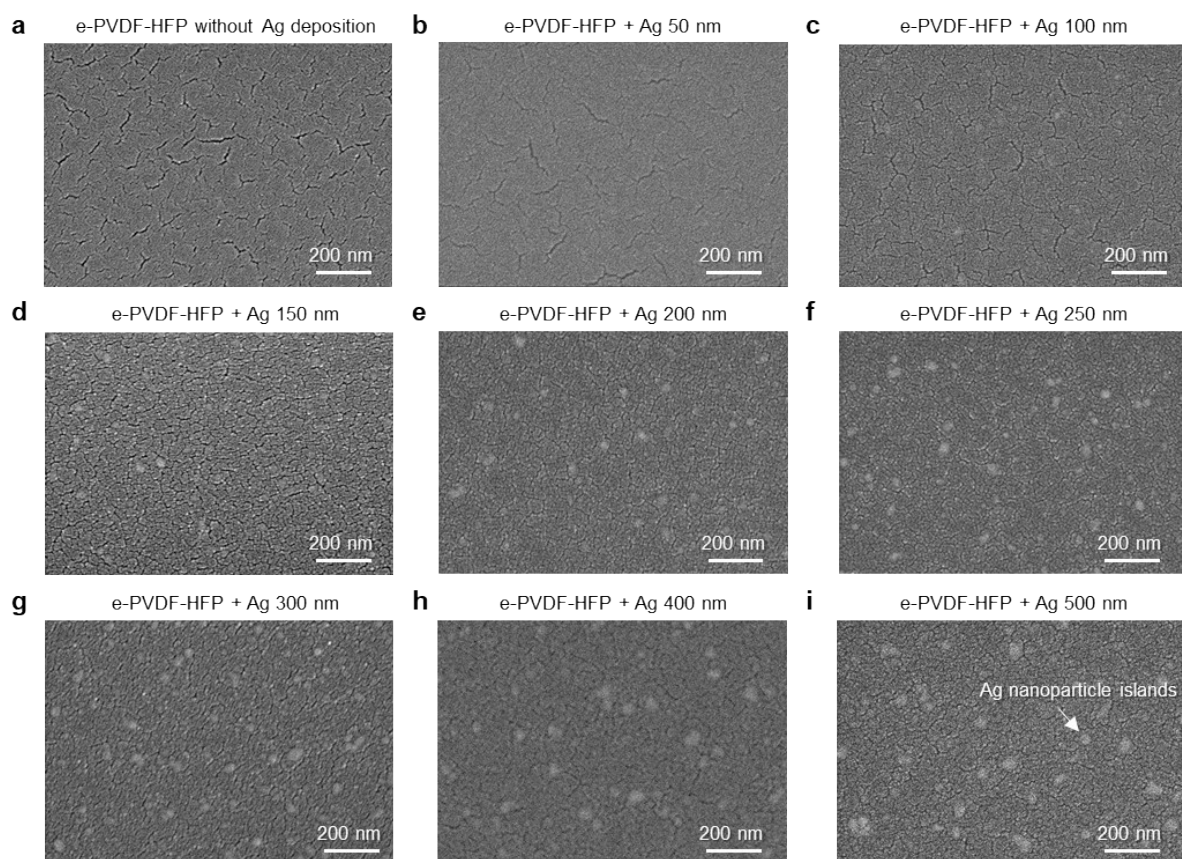

Figure S8. FE-SEM images of e-PVDF-HFP with different Ag deposition thicknesses, indicating increased growth of Ag nanoparticle islands as Ag deposition thicknesses increased. (a) 0 nm (without Ag deposition), (b) 50 nm, (c) 100 nm, (d) 150 nm, (e) 200 nm, (f) 250 nm, (g) 300 nm, (h) 400 nm, and (i) 500 nm.

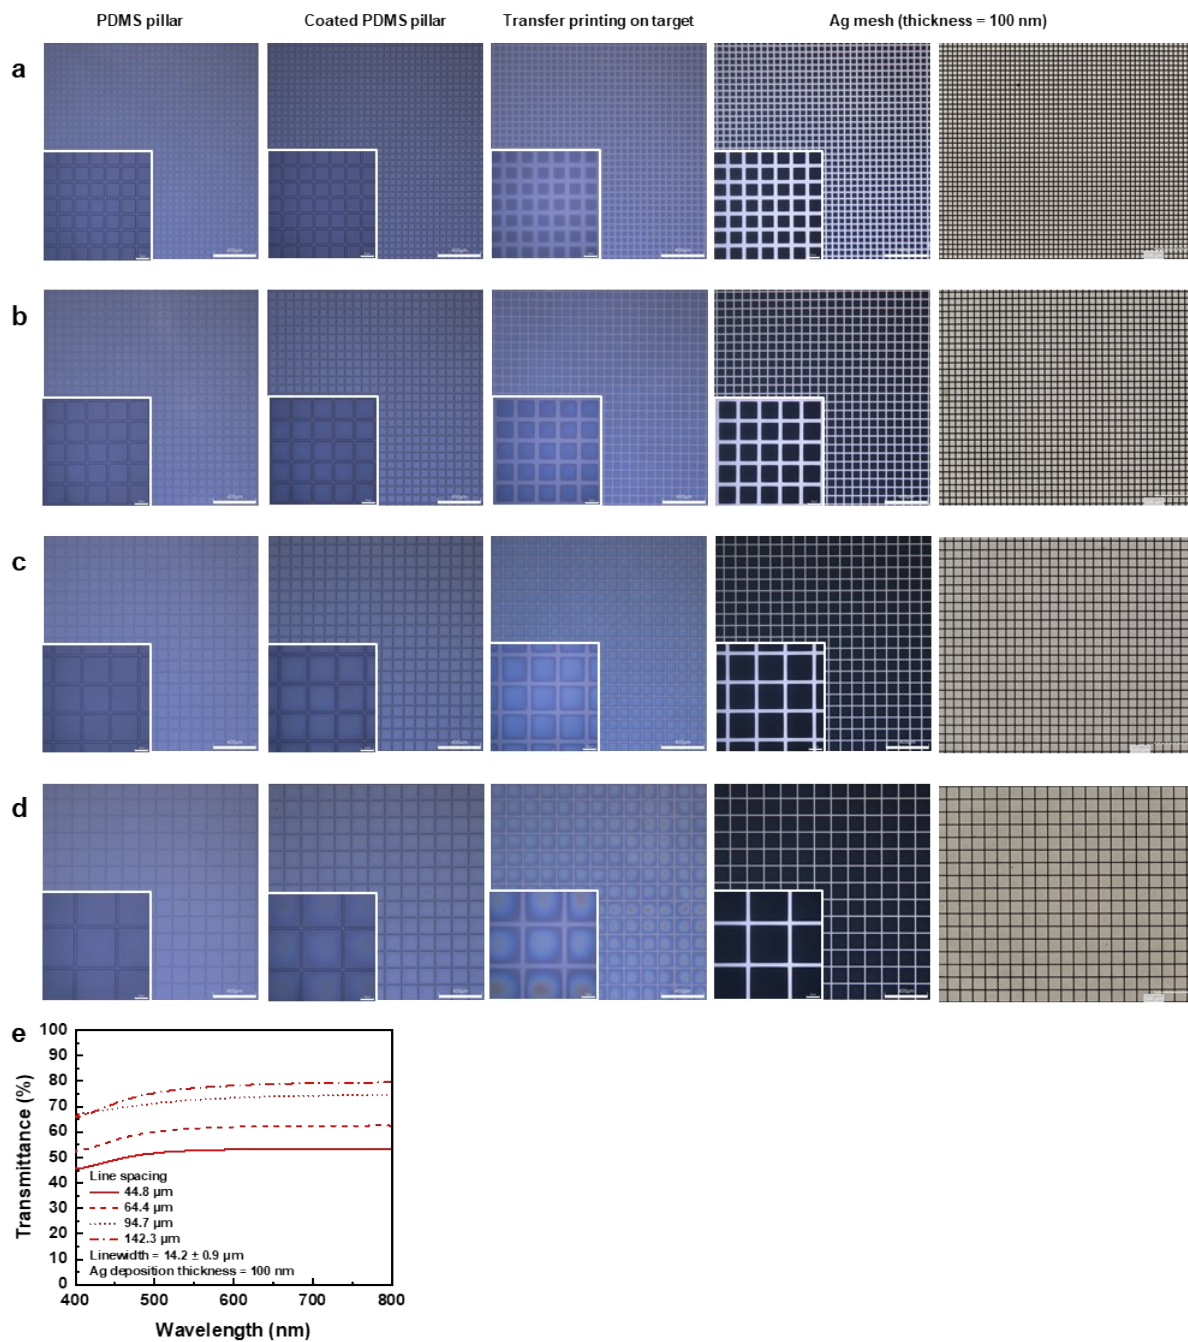

Figure S9. Metal mesh with different line spacing (a)-(d) Optical microscopic image (e)

Transmittance

Table S2. Detailed data of metal mesh with different line spacing

|   | Line spacing ( $\mu\text{m}$ ) | Mesh linewidth ( $\mu\text{m}$ ) | Mesh pitch ( $\mu\text{m}$ ) | e-PVDF-HFP pattern height (nm) | Ag thickness (nm) | %T   | Rs (ohm/sq) | Haze (%) | FoM ( $\sigma_{\text{de}}/\sigma_{\text{op}}$ ) [1] | FoM (Haacke, $\times 10^{-3}$ ) [2] |
|---|--------------------------------|----------------------------------|------------------------------|--------------------------------|-------------------|------|-------------|----------|-----------------------------------------------------|-------------------------------------|
| a | 44.8                           | 14.8                             | 59.6                         | 80.6                           | 100               | 57.5 | 0.887       | 5.6      | 666.0                                               | 4.4                                 |
| b | 64.4                           | 14.4                             | 78.9                         | 99.7                           | 100               | 66.9 | 1.148       | 3.9      | 737.3                                               | 15.6                                |
| c | 94.7                           | 12.9                             | 107.7                        | 103.35                         | 100               | 79.1 | 1.566       | 2.7      | 970.3                                               | 61.6                                |
| d | 142.3                          | 14.6                             | 156.9                        | 129.8                          | 100               | 84.2 | 1.872       | 1.8      | 1117.7                                              | 95.2                                |

#### References

[1] M. Dressel and G. Grüner, *Electrodynamics of Solids: Optical Properties of Electrons in Matter*, Cambridge University Press, Cambridge, 2002.

[2] G. Haacke, *J. Appl. Phys.*, 1976, 47, 4086-4089.

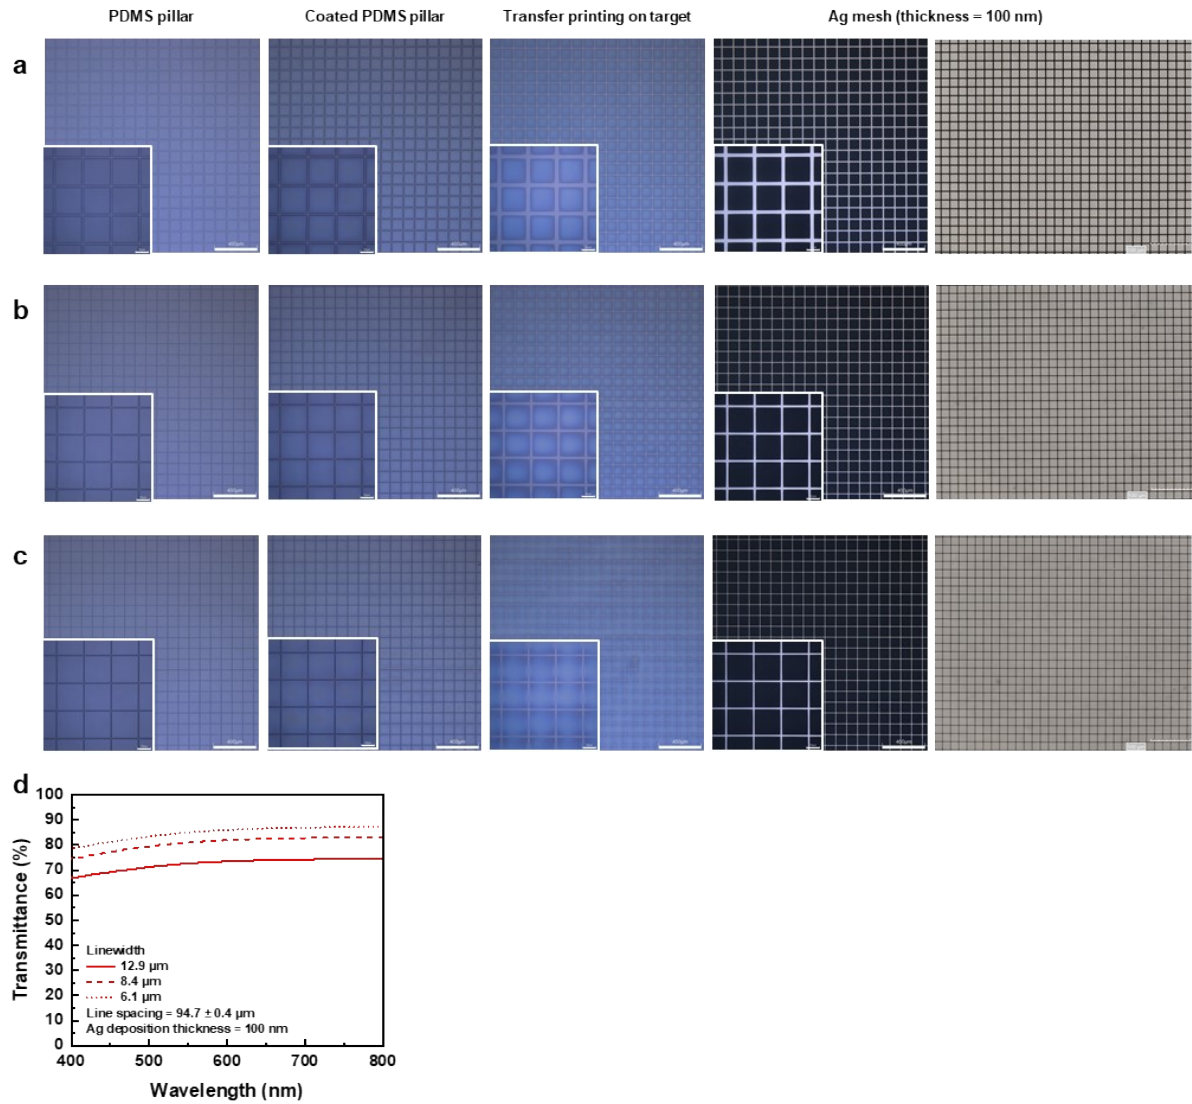

Figure S10. Metal mesh with different linewidth (a)-(c) Optical microscopic image (d) Transmittance

Table S3. Detailed data of metal mesh with different linewidth

|   | Line spacing (μm) | Mesh linewidth (μm) | Mesh pitch (μm) | e-PVDF-HFP pattern height (nm) | Ag thickness (nm) | %T   | Rs (ohm/sq) | Haze (%) | FoM ( $\sigma_{dc}/\sigma_{op}$ ) [1] | FoM (Haacke, $\times 10^{-3}$ ) [2] |
|---|-------------------|---------------------|-----------------|--------------------------------|-------------------|------|-------------|----------|---------------------------------------|-------------------------------------|
| a | 94.7              | 12.9                | 107.7           | 92.8                           | 100               | 79.1 | 1.566       | 2.7      | 970.3                                 | 61.6                                |
| b | 94.4              | 8.4                 | 102.8           | 127                            | 100               | 88.3 | 2.632       | 2.8      | 1114.6                                | 109.3                               |
| c | 95.1              | 6.1                 | 101.2           | 134.6                          | 100               | 92.6 | 3.903       | 2.9      | 1229.9                                | 118.6                               |

#### References

[1] M. Dressel and G. Grüner, *Electrodynamics of Solids: Optical Properties of Electrons in Matter*, Cambridge University Press, Cambridge, 2002.

[2] G. Haacke, *J. Appl. Phys.*, 1976, 47, 4086-4089.

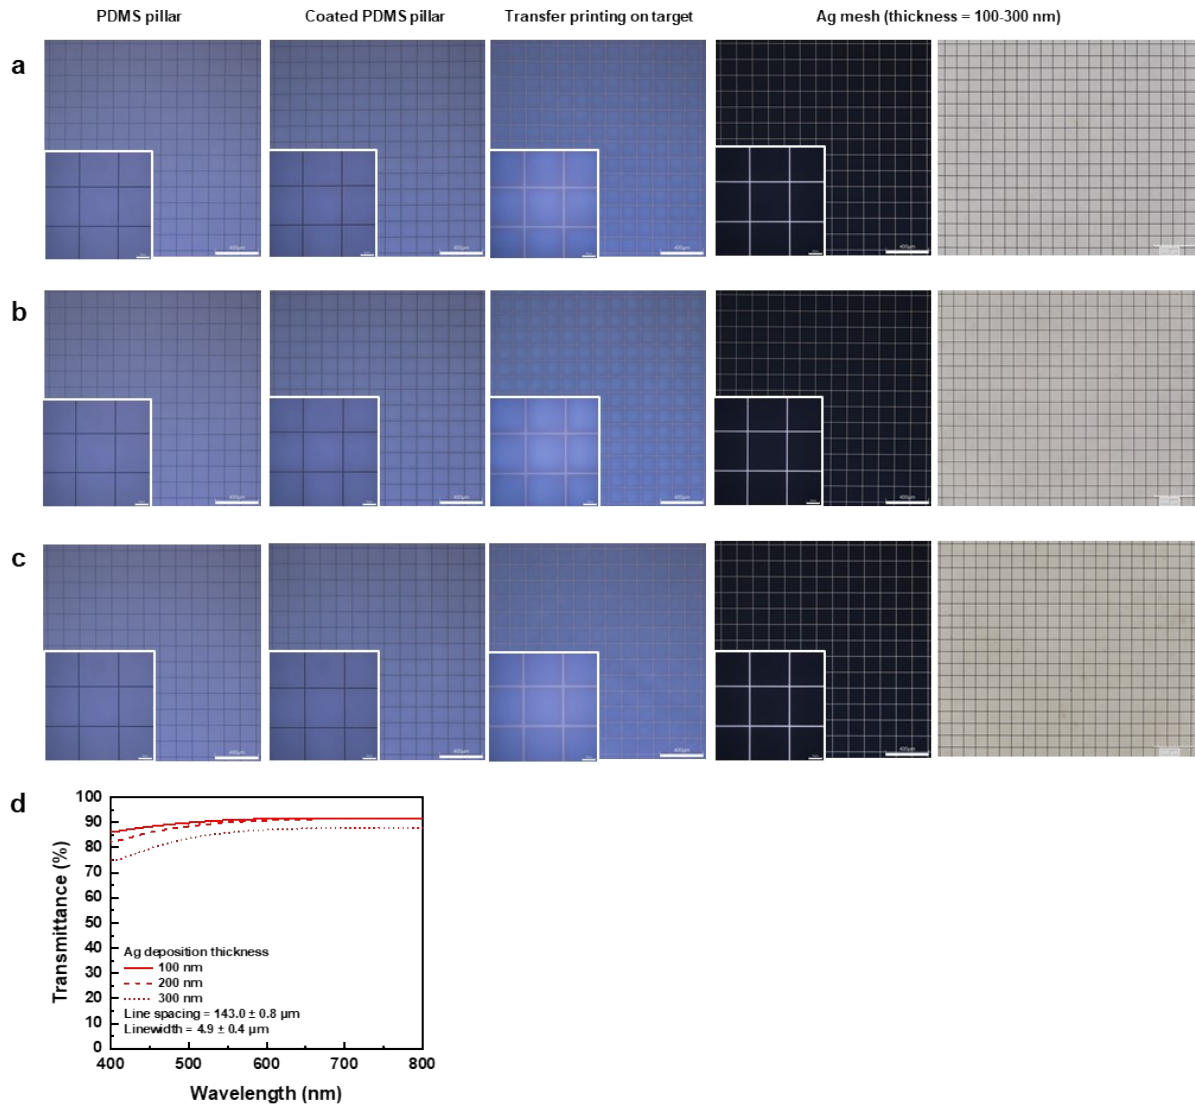

Figure S11. Metal mesh with different thickness (a)-(c) Optical microscopic image (d)

Transmittance

Table S4. Detailed data of metal mesh with different thickness

|   | Line spacing ( $\mu\text{m}$ ) | Mesh linewidth ( $\mu\text{m}$ ) | Mesh pitch ( $\mu\text{m}$ ) | Ag thickness (nm) | %T   | $R_s$ (ohm/sq) | Haze (%) | FoM ( $\sigma_{dc}/\sigma_{op}$ ) [1] | FoM (Haacke, $\times 10^{-3}$ ) [2] |
|---|--------------------------------|----------------------------------|------------------------------|-------------------|------|----------------|----------|---------------------------------------|-------------------------------------|
| a | 142.9                          | 4.7                              | 147.7                        | 100               | 99.0 | 4.443          | 1.8      | 8866.4                                | 204.6                               |
| b | 143.9                          | 4.7                              | 148.6                        | 200               | 98.0 | 1.777          | 1.9      | 10756.4                               | 462.4                               |
| c | 142.3                          | 5.4                              | 147.6                        | 300               | 93.6 | 1.115          | 2.4      | 5038.1                                | 463.5                               |

#### References

[1] M. Dressel and G. Grüner, *Electrodynamics of Solids: Optical Properties of Electrons in Matter*, Cambridge University Press, Cambridge, 2002.

[2] G. Haacke, *J. Appl. Phys.*, 1976, 47, 4086-4089.

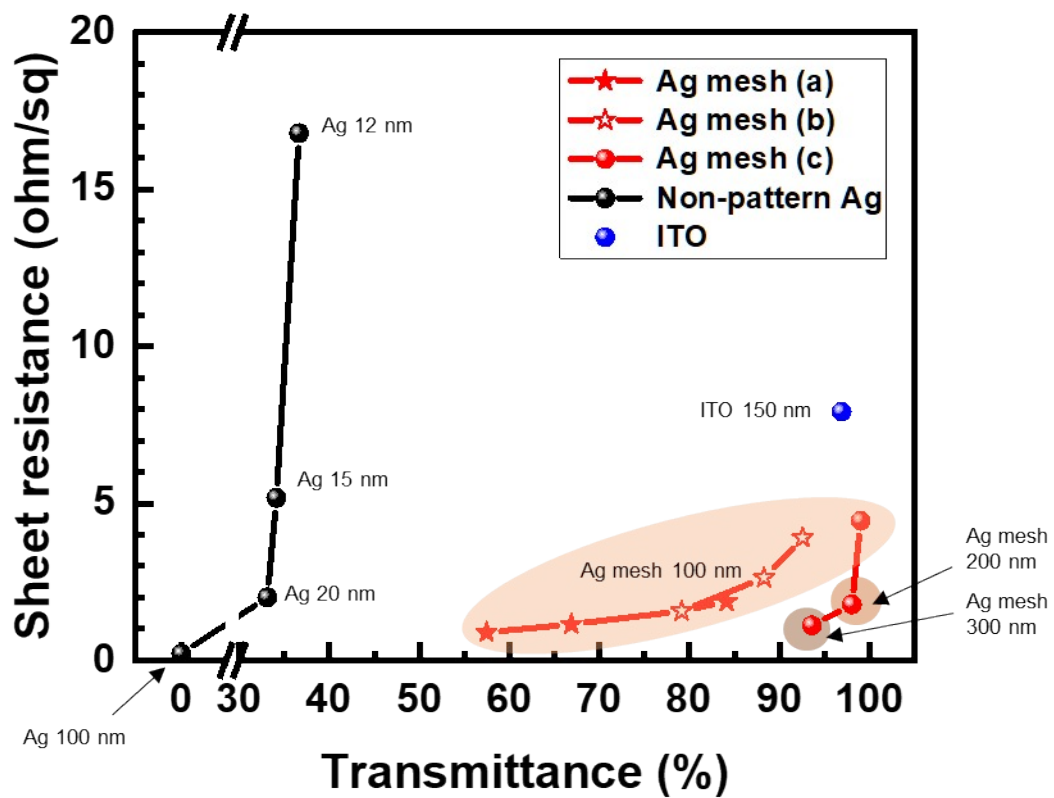

Figure S12. Comparison of measured transmittance and sheet resistance of fabricated metal mesh to non-patterned metal and commercial ITO glass

Table S5. Measured transmittance and sheet resistance of fabricated metal mesh with different line spacing, linewidth or thickness

| Metal mesh group |    | Linewidth ( $\mu\text{m}$ ) | Line spacing ( $\mu\text{m}$ ) | Thickness (nm) | Transmittance (%) | Sheet Resistance (ohm/sq) |
|------------------|----|-----------------------------|--------------------------------|----------------|-------------------|---------------------------|
| Line spacing     | A1 | 14.8                        | 44.8                           | 100            | 57.5              | 0.887                     |
|                  | A2 | 14.4                        | 64.4                           | 100            | 66.9              | 1.15                      |
|                  | A3 | 14.6                        | 142.3                          | 100            | 84.2              | 1.87                      |
| Linewidth        | B1 | 12.9                        | 94.7                           | 100            | 79.1              | 1.57                      |
|                  | B2 | 8.4                         | 94.4                           | 100            | 88.3              | 2.63                      |
|                  | B3 | 6.1                         | 95.1                           | 100            | 92.6              | 3.90                      |
| Thickness        | C1 | 4.7                         | 142.9                          | 100            | 99.0              | 4.44                      |
|                  | C2 | 4.7                         | 143.9                          | 200            | 98.1              | 1.78                      |
|                  | C3 | 5.4                         | 142.3                          | 300            | 93.6              | 1.11                      |

Table S6. Comparison of transmittance, sheet resistance, and figure of merits to previous studies with high-performance thin-film transparent electrodes incorporating transparent conductive oxides<sup>1, 2</sup>, ultrathin metal films<sup>3, 4</sup>, D/M/D multilayers<sup>5, 6</sup>, AgNWs<sup>7, 8</sup>, graphene<sup>9</sup>, CNT<sup>10</sup>, evaporated<sup>11, 12</sup> or printed<sup>13, 14</sup> metal mesh.

| Ref#     | Electrode                     | Year | Fabrication method                                                     | Transmittance (%T) | Sheet resistance (ohm/sq) | Figure of merit ( $\sigma_{dc}/\sigma_{sp}$ ) [15] | Figure of merit ( $T^{10}/R_s, \times 10^{-3}$ ) [16] |
|----------|-------------------------------|------|------------------------------------------------------------------------|--------------------|---------------------------|----------------------------------------------------|-------------------------------------------------------|
| [1]      | Transparent Conducting Oxides | 2000 | Pulsed laser deposition (PLD) ITO                                      | 88.05-95.12        | 7-58                      | 61.7-409.9                                         | 6.17-40.01                                            |
| [2]      |                               | 2021 | Sputtering IZO                                                         | 75.07-88.96        | 11.44-48.75               | 37.8-273.5                                         | 2.24-27.13                                            |
| [3]      | Ultrathin metal films         | 2020 | TPBi/Ca/Ag 30/3/8-11nm Deposition                                      | 58.5-74.5          | 5.5-8.8                   | 111.5-135.1                                        | 0.85-5.99                                             |
| [4]      |                               | 2025 | ZnO/Yb:Ag(6%) 3/13-19nm Deposition                                     | 77.6-86.8          | 11.1-16.8                 | 123.0-221.0                                        | 7.16-20.86                                            |
| [5]      | D/M/D multilayers             | 2020 | ITO/Ag/ITO 35/8/12nm (simulation) or ZnO/Ag/ZnO 47/6/12nm (simulation) | 95.4-95.5          | 4.7-7.14                  | 1108.1-1722.1                                      | 87.46-134.26                                          |
| [6]      |                               | 2006 | ZnO/Ag/ZnO 20/5-8/20nm Sputtering                                      | 88.0-95.5          | 0.8-3.5                   | 1374.3-3569.9                                      | 132.45-348.13                                         |
| [7]      | Aligned AgNWs                 | 2023 | AgNW direct writing (using triple conical fibers)                      | 95.8-98.5          | 12.5-25.5                 | 604.6-974.5                                        | 33.71-52.09                                           |
| [8]      |                               | 2022 | AgNW EHD printing                                                      | 89.7-99.1          | 5.4-91                    | 430.4-625.0                                        | 10.04-62.45                                           |
| [9]      | Graphene or CNT               | 2025 | Graphene, CVD + transfer + PMMA removing in water                      | 92.3-97.2          | 288-713.5                 | 14.2-18.5                                          | 1.06-1.56                                             |
| [10]     |                               | 2019 | DWCNT, slot-die coating + acid treatment                               | 85.3-98.2          | 145-968.8                 | 15.7-24.4                                          | 0.86-1.72                                             |
| [11]     | Evaporated metal mesh         | 2021 | Cu deposition + HDT pattern uCP                                        | 80.3-92.1          | 3.1-9.6                   | 446.9-524.4                                        | 34.82-45.74                                           |
| [12]     |                               | 2023 | Ag, Selective deposition                                               | 77.5-91.5          | 2.2-7.6                   | 371.1-630.4                                        | 32.81-54.12                                           |
| [13]     | Printed metal mesh            | 2023 | AgNP Inkjet Printing                                                   | 79.6-89.3          | 5.6-16.3                  | 198.6-306.5                                        | 18.24-26.51                                           |
| [14]     |                               | 2018 | AgNP Reverse-offset Printing                                           | 76.5-93.2          | 6.1-17                    | 215.6-353.9                                        | 11.25-34.22                                           |
| Our work | Evaporated metal mesh         | 2025 | Transfer printing + Selective deposition, Ag                           | 93.6-99.0          | 1.11-4.44                 | 5038.1-10756.4                                     | 204.6-463.5                                           |

## References

- [1] H. Kim, J. S. Horwitz, G. Kushto, A. Piqué, Z. H. Kafafi, C. M. Gilmore and D. B. Chrisey, *J. Appl. Phys.*, 2000, **88**, 6021-6025.
- [2] Z. Ying, Y. Zhu, X. Feng, J. Xiu, R. Zhang, X. Ma, Y. Deng, H. Pan and Z. He, *Adv. Mater. Interfaces*, 2021, **8**, 2001604.
- [3] D. Yin, Z.-Y. Chen, N.-R. Jiang, Y.-F. Liu, Y.-G. Bi, X.-L. Zhang, W. Han, J. Feng and H.-B. Sun, *Org. Electron.*, 2020, **76**, 105494.
- [4] E.-y. Choi, S.-C. Kang, K. Kim, S.-H. Lee, J.-B. Kim and J.-K. Song, *Light Sci. Appl.*, 2025, **14**, 62.
- [5] H. Ferhati and F. Djeflal, *J. Comput. Electron.*, 2020, **19**, 815-824.
- [6] D. R. Sahu, S.-Y. Lin and J.-L. Huang, *Appl. Surf. Sci.*, 2006, **252**, 7509-7514.
- [7] K. Zhang, L. Meng, M. Zhang, Y. Li, L. Jiang and H. Liu, *Adv. Funct. Mater.*, 2024, **34**, 2308468.
- [8] X. Feng, L. Wang, Y. Y. S. Huang, Y. Luo, J. Ba, H. H. Shi, Y. Pei, S. Zhang, Z. Zhang, X. Jia and B. Lu, *ACS Appl. Mater. Interfaces*, 2022, **14**, 39199-39210.
- [9] B. Kulyk, J. C. Germino, D. Gaspar, A. J. S. Fernandes, J. Deuermeier, A. F. Carvalho, A. F. da Cunha, L. M. N. Pereira, L. Pereira and F. M. Costa, *J. Mater. Chem. C*, 2025, **13**, 5855-5864.
- [10] I. Jeon, J. Yoon, U. Kim, C. Lee, R. Xiang, A. Shawky, J. Xi, J. Byeon, H. M. Lee, M. Choi, S. Maruyama and Y. Matsuo, *Adv. Energy Mater.*, 2019, **9**, 1901204.

- [11] P. Bellchambers, S. Varagnolo, C. Maltby and R. A. Hatton, *ACS Appl. Energy Mater.*, 2021, **4**, 4150-4155.
- [12] P. Bellchambers, C. Henderson, S. Abrahamczyk, S. Choi, J.-K. Lee and R. A. Hatton, *Adv. Mater.*, 2023, **35**, 2300166.
- [13] L.-Q. Yao, Y. Qin, X.-C. Li, Q. Xue, F. Liu, T. Cheng, G.-J. Li, X. Zhang and W.-Y. Lai, *InfoMat*, 2023, **5**, e12410.
- [14] Z. Jiang, K. Fukuda, X. Xu, S. Park, D. Inoue, H. Jin, M. Saito, I. Osaka, K. Takimiya and T. Someya, *Adv. Mater.*, 2018, **30**, 1707526.
- [15] M. Dressel and G. Grüner, *Electrodynamics of Solids: Optical Properties of Electrons in Matter*, Cambridge University Press, Cambridge, 2002.
- [16] G. Haacke, *J. Appl. Phys.*, 1976, **47**, 4086-4089.

Table S7. Comparison of transmittance, sheet resistance, and figure of merits to previous studies with the transparent electrode of OLED device applications incorporating ultrathin metal films<sup>1, 2</sup>, D/M/D multilayers<sup>3, 4</sup>, conducting polymers<sup>5, 6</sup>, AgNWs<sup>7, 8</sup>, graphene<sup>9, 10</sup>, evaporated<sup>11, 12</sup> or printed<sup>13, 14</sup> metal mesh.

| Ref#     | Electrode             | Year | Fabrication method                                | Transmittance (%T)  | Sheet resistance (ohm/sq) | Figure of merit ( $\sigma_s/\sigma_{sp}$ ) [15] | Figure of merit ( $T^{10}/R_s, \times 10^{-3}$ ) [16] |
|----------|-----------------------|------|---------------------------------------------------|---------------------|---------------------------|-------------------------------------------------|-------------------------------------------------------|
| [1]      | Ultrathin metal films | 2020 | TPBi/Ca/Ag 30/3/8-11nm Deposition                 | 58.5-74.5           | 5.5-8.8                   | 111.5-135.1                                     | 0.85-5.99                                             |
| [2]      |                       | 2025 | ZnO/Yb:Ag(6%) 3/13-19nm Deposition                | 77.6-86.8           | 11.1-16.8                 | 123.0-221.0                                     | 7.16-20.86                                            |
| [3]      | D/M/D multilayers     | 2016 | MoOx/Au/MoOx 40/10-15/40nm E-beam evaporation     | 84.9-90.4           | 3.6-7.0                   | 520.9-614.8                                     | 52.13-54.17                                           |
| [4]      |                       | 2008 | IZTO/Ag/IZTO 30/12-20/30nm Sputtering             | 73.8-86.0           | 2.4-7.4                   | 233.6-482.3                                     | 17.05-44.35                                           |
| [5]      | Conducting polymers   | 2017 | PEDOT:PSS + ionic liquid (dry transfer)           | 91                  | 67                        | 63                                              | 5.81                                                  |
| [6]      |                       | 2015 | PEDOT:PSS + AgNW                                  | 80-90               | 8.5-123                   | 28.3-187.9                                      | 2.83-12.63                                            |
| [7]      | Aligned AgNWs         | 2014 | AgNW + reduced Ag ion ink                         | ~95                 | 27.5-39.5                 | 183.7-263.9                                     | 15.16-21.77                                           |
| [8]      |                       | 2022 | AgNW EHD printing                                 | 89.7-99.1           | 5.4-91                    | 430.4-625.0                                     | 10.04-62.45                                           |
| [9]      | graphene              | 2015 | Multilayer graphene (transfer)                    | 84.9 (CsF:graphene) | 118                       | 18.7                                            | 1.65                                                  |
| [10]     |                       | 2025 | Graphene, CVD + transfer + PMMA removing in water | 92.3-97.2           | 288-713.5                 | 14.2-18.5                                       | 1.06-1.56                                             |
| [11]     | Evaporated metal mesh | 2020 | Au/Ag bilayer metal grid On crack template        | 85                  | 5.2                       | 428.2                                           | 37.86                                                 |
| [12]     |                       | 2022 | Cu deposition + lift off on crack template        | 76.5-93             | 3.4-13.4                  | 380.7-386.8                                     | 20.19-36.12                                           |
| [13]     | Printed metal mesh    | 2023 | AgNP Inkjet Printing                              | 79.6-89.3           | 5.6-16.3                  | 198.6-306.5                                     | 18.24-26.51                                           |
| [14]     |                       | 2017 | Ag ink gravure off-set printing                   | 81.8-86.5           | 4.0-19                    | 131.9-446.0                                     | 12.34-33.53                                           |
| Our work | Evaporated metal mesh | 2025 | Transfer printing + Selective deposition, Ag      | 93.6-99.0           | 1.11-4.44                 | 5038.1-10756.4                                  | 204.6-463.5                                           |

## References

- [1] D. Yin, Z.-Y. Chen, N.-R. Jiang, Y.-F. Liu, Y.-G. Bi, X.-L. Zhang, W. Han, J. Feng and H.-B. Sun, *Org. Electron.*, 2020, **76**, 105494.
- [2] E.-y. Choi, S.-C. Kang, K. Kim, S.-H. Lee, J.-B. Kim and J.-K. Song, *Light Sci. Appl.*, 2025, **14**, 62.
- [3] M. Kim, C. Lim, D. Jeong, H.-S. Nam, J. Kim and J. Lee, *Org. Electron.*, 2016, **36**, 61-67.
- [4] K.-H. Choi, H.-J. Nam, J.-A. Jeong, S.-W. Cho, H.-K. Kim, J.-W. Kang, D.-G. Kim and W.-J. Cho, *Appl. Phys. Lett.*, 2008, **92**, 223302.
- [5] S. Kee, N. Kim, B. Park, B. S. Kim, S. Hong, J.-H. Lee, S. Jeong, A. Kim, S.-Y. Jang and K. Lee, *Adv. Mater.*, 2018, **30**, 1703437.
- [6] M. Zhang, S. Höfle, J. Czolk, A. Mertens and A. Colmann, *Nanoscale*, 2015, **7**, 20009-20014.
- [7] R. E. Triambulo, H.-G. Cheong and J.-W. Park, *Org. Electron.*, 2014, **15**, 2685-2695.
- [8] X. Feng, L. Wang, Y. Y. S. Huang, Y. Luo, J. Ba, H. H. Shi, Y. Pei, S. Zhang, Z. Zhang, X. Jia and B. Lu, *ACS Appl. Mater. Interfaces*, 2022, **14**, 39199-39210.
- [9] J.-H. Chang, W.-H. Lin, P.-C. Wang, J.-I. Taur, T.-A. Ku, W.-T. Chen, S.-J. Yan and C.-I. Wu, *Sci. Rep.*, 2015, **5**, 9693.
- [10] B. Kulyk, J. C. Germino, D. Gaspar, A. J. S. Fernandes, J. Deuermeier, A. F. Carvalho, A. F. da Cunha, L. M. N. Pereira, L. Pereira and F. M. Costa, *J. Mater. Chem. C*, 2025, **13**, 5855-5864.

- [11] X. Huang, F. Zhang, Y. Liu and J. Leng, *ACS Appl. Mater. Interfaces*, 2020, **12**, 23236-23243.
- [12] P. Liu, B. Huang, L. Peng, L. Liu, Q. Gao and Y. Wang, *Sci. Rep.*, 2022, **12**, 20494.
- [13] L.-Q. Yao, Y. Qin, X.-C. Li, Q. Xue, F. Liu, T. Cheng, G.-J. Li, X. Zhang and W.-Y. Lai, *InfoMat*, 2023, **5**, e12410.
- [14] S. Park, J. T. Lim, W.-Y. Jin, H. Lee, B.-H. Kwon, N. S. Cho, J.-H. Han, J.-W. Kang, S. Yoo and J.-I. Lee, *ACS Photonics*, 2017, **4**, 1114-1122.
- [15] M. Dressel and G. Grüner, *Electrodynamics of Solids: Optical Properties of Electrons in Matter*, Cambridge University Press, Cambridge, 2002.
- [16] G. Haacke, *J. Appl. Phys.*, 1976, **47**, 4086-4089.

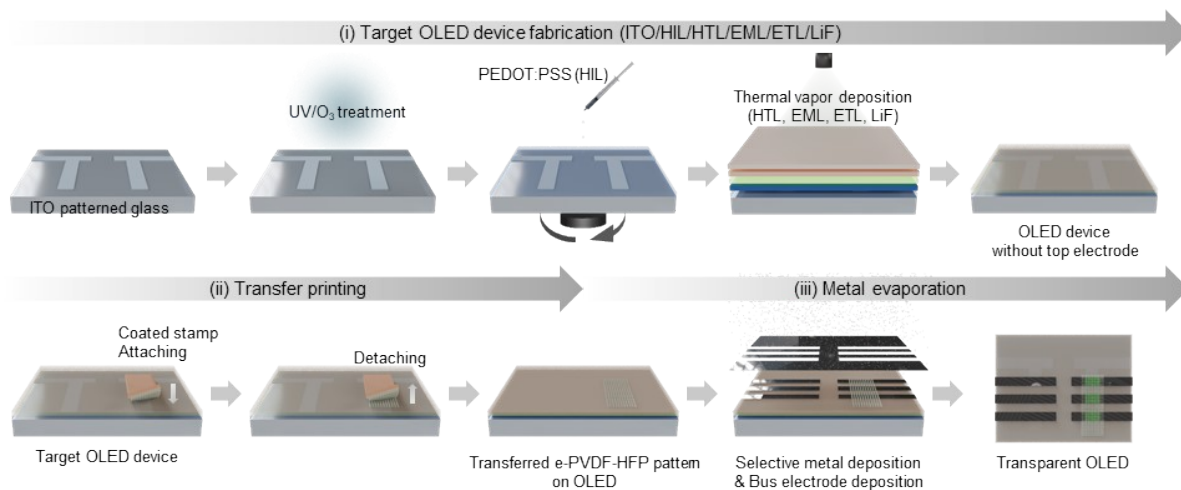

Figure S13. Fabrication process of transparent OLED with top metal mesh cathode

Table S8. Transmittance and sheet resistance of non-patterned Ag with different thicknesses

| Ag deposition thickness (nm) | Transmittance (%T, at 550 nm) |                   | Sheet resistance (ohm/sq) |
|------------------------------|-------------------------------|-------------------|---------------------------|
|                              | Raw data                      | Without substrate |                           |
| Glass substrate              | 91.7548                       | -                 | -                         |
| 10                           | 33.10                         | 36.08             | >2M (2019367.3)           |
| 12                           | 36.61                         | 39.90             | 16.784                    |
| 15                           | 34.09                         | 37.15             | 5.171                     |
| 20                           | 33.10                         | 36.07             | 2.006                     |
| 25                           | 24.85                         | 27.08             | 1.383                     |
| 30                           | 16.67                         | 18.17             | 1.000                     |
| 50                           | 3.660                         | 3.989             | 0.535                     |
| 100                          | 0.05740                       | 0.06256           | 0.213                     |
| 200                          | -                             | -                 | 0.1                       |
| 300                          | -                             | -                 | 0.064                     |

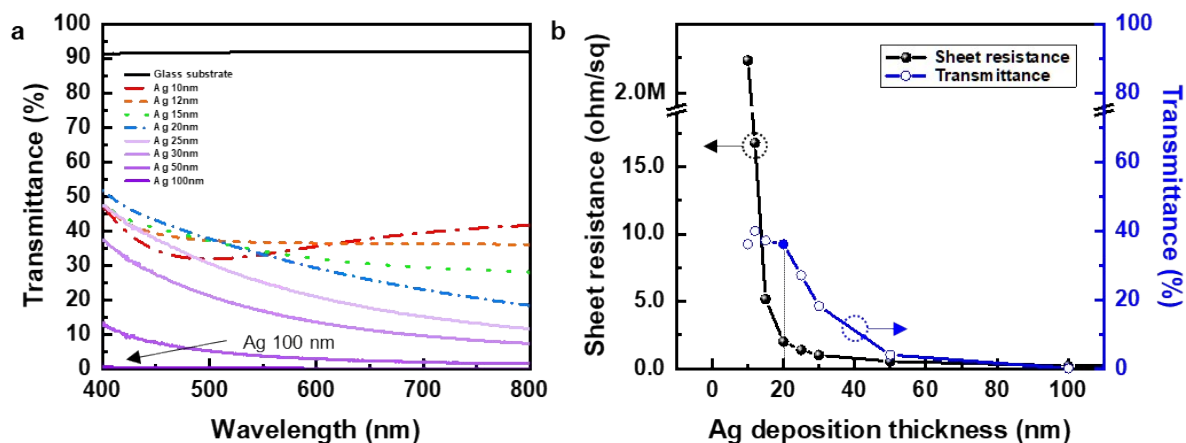

Figure S14. (a) Transmittance, (b) transmittance and sheet resistance of non-patterned Ag with different thicknesses

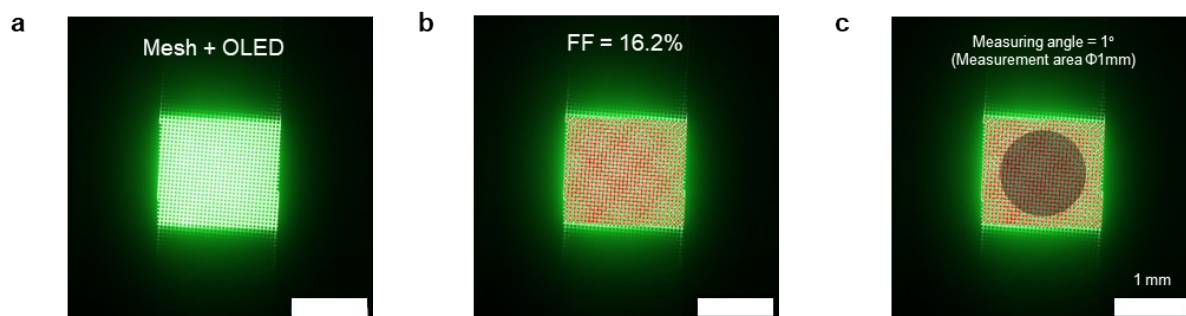

Figure S15. Luminance measurement area and areal fill factor extracted from emission image (Scale bar = 1 mm) (a) Emission image taken with average current density of  $22.3 \text{ mA cm}^{-1}$  (0.5 mA) (b) Emission area analysis using ImageJ plugin, highlighted in red (c) luminance measurement area (annotated circle), measuring angle =  $1^\circ$

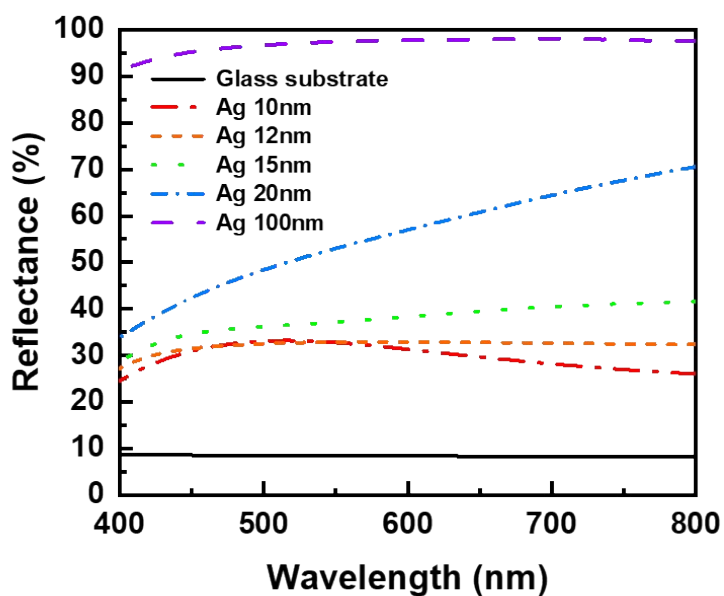

Figure S16. Reflectance of non-patterned Ag with different thickness

Table S9. Reflectance of non-patterned Ag with different thickness

| Ag deposition thickness (nm) | Reflectance (%R, at 550 nm) |
|------------------------------|-----------------------------|
| Glass substrate              | 8.43                        |
| 10                           | 32.77                       |
| 12                           | 32.85                       |
| 15                           | 37.16                       |
| 20                           | 52.99                       |
| 100                          | 97.39                       |

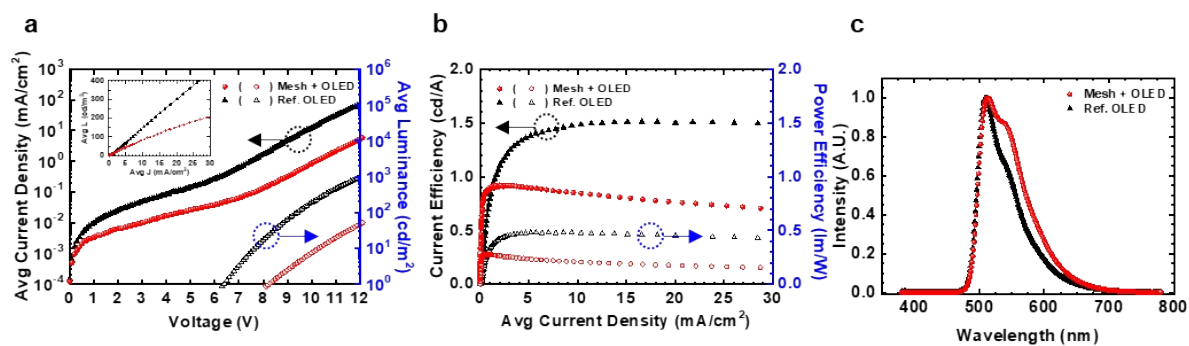

Figure S17. OLED device characteristics measured from top side (a) J-V-L graph (inset : J-L graph) (b) Current and power efficiencies (c) EL spectra

Table S10. OLED device characteristics measured from top and bottom side

|             | Max. CE (cd/A) / PE (lm/W) / EQE (%) |                  | Average L (cd/m <sup>2</sup> ) At J <sub>avg</sub> = 25 mA/cm <sup>2</sup> |        |              | λ <sub>max</sub> (nm) |        | CIE (x,y)    |              |
|-------------|--------------------------------------|------------------|----------------------------------------------------------------------------|--------|--------------|-----------------------|--------|--------------|--------------|
|             | Top                                  | Bottom           | Top                                                                        | Bottom | Top + Bottom | Top                   | Bottom | Top          | Bottom       |
| Mesh + OLED | 0.92 / 0.28 / 0.26                   | 14.2 / 4.3 / 4.2 | 185 (14v)                                                                  | 2884   | 3069         | 513                   | 511    | (0.32, 0.62) | (0.30, 0.62) |
| Ref. OLED   | 1.5 / 0.48 / 0.44                    | 8.7 / 2.7 / 2.5  | 391 (10.8v)                                                                | 2238   | 2629         | 510                   | 511    | (0.29, 0.62) | (0.30, 0.62) |

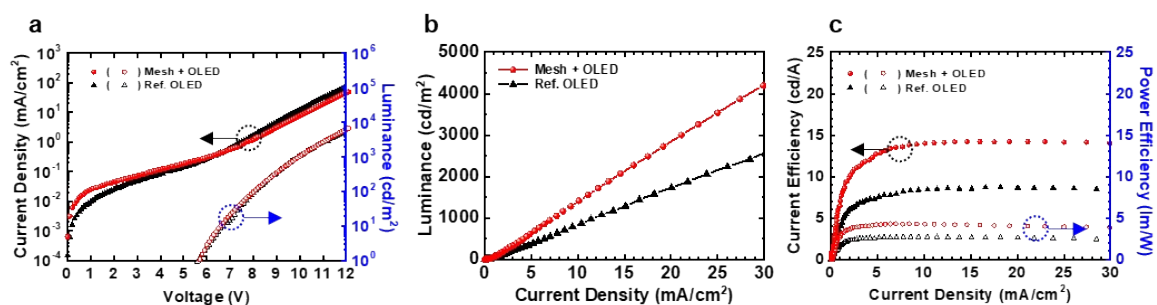

Figure S18. Areal fill factor compensation of average current density and average luminance

(a) J-V-L graph with areal fill factor compensation (b) J-L graph with areal fill factor compensation (c) Current and power efficiencies with areal fill factor compensation

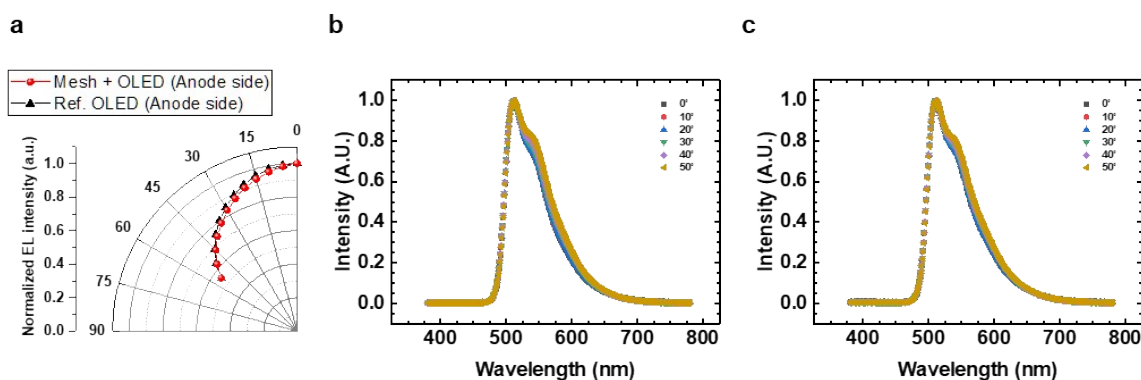

Figure S19. (a) Angular-dependent electroluminescence (EL) properties of the devices with mesh-patterned and planar thin silver top electrodes. (b)-(c) Angular-dependent EL spectra of the device (b) with mesh-patterned silver top electrodes and (c) with planar thin silver top electrodes (Ref. OLED). All results ((a)-(c)) were measured from the bottom ITO (anode) side.

Table S11. Comparison of OLED device characteristics to previous studies with transparent electrodes incorporating ultrathin metal film<sup>1, 2</sup>, D/M/D multilayer<sup>3, 4</sup>, conducting polymer<sup>5, 6</sup>, AgNW<sup>7, 8</sup>, graphene<sup>9, 10</sup>, evaporated<sup>11, 12</sup> or printed<sup>13, 14</sup> metal mesh.

| Ref#     | Electrode             | Year | OLED device demonstration |                                               |                                            |                                                                                    | Device performance                 |                                      |                                     |
|----------|-----------------------|------|---------------------------|-----------------------------------------------|--------------------------------------------|------------------------------------------------------------------------------------|------------------------------------|--------------------------------------|-------------------------------------|
|          |                       |      | Transparency              | Emission Layer                                | Bottom Electrode                           | Top Electrode                                                                      | Max. L (cd/m <sup>2</sup> )        | Max. CE (cd/A)                       | Max. EQE (%)                        |
| [1]      | Ultrathin metal film  | 2020 | O                         | mCP:Ir(ppy) <sub>3</sub> , green              | Thin metal film MoO <sub>3</sub> /Au       | Thin metal film TPBi/Ca/Ag/NPB                                                     | 17900 (bottom)<br>15300 (top)      | 12.4 (bottom)<br>12.8 (top)          | -                                   |
| [2]      |                       | 2025 | O                         | TCTA:Bphen:Ir(ppy) <sub>3</sub> , green       | ITO                                        | Thin metal film ZnO/Yb:Ag(6%)/NPB                                                  | 50227 (bottom)<br>19486 (top)      | 22.1 (bottom)<br>10.5 (top)          | -                                   |
| [3]      | D/M/D multilayers     | 2016 | X                         | Alq <sub>3</sub> :C545T, green                | MoOx/Au/MoOx                               | Al 150nm                                                                           | -                                  | 11.46                                | -                                   |
| [4]      |                       | 2008 | X                         | CBP:Ir(ppy) <sub>3</sub> , green              | IZTO/Ag/IZTO                               | Al 100nm                                                                           | -                                  | -                                    | -                                   |
| [5]      | Conducting polymer    | 2017 | O                         | PDY-132, yellow                               | PEDOT:PSS                                  | PEDOT:PSS (transfer)                                                               | 3200                               | 2.8 (total)                          | -                                   |
|          |                       |      | O                         | SPW-111, white                                |                                            |                                                                                    | 1200                               | 2.7 (total)                          | -                                   |
| [6]      | Conducting polymer    | 2015 | O                         | Super Yellow, yellow                          | PEDOT:PSS                                  | PEDOT:PSS/AgNW                                                                     | at 20mA/cm <sup>2</sup>            | 2260 (bottom)<br>1760 (top)          | 11.3 (bottom)<br>8.3 (top)          |
|          |                       |      | O                         | Merck Blue, blue                              |                                            |                                                                                    | at 20mA/cm <sup>2</sup>            | 270 (bottom)<br>230 (top)            | 1.4 (bottom)<br>1.1 (top)           |
| [7]      | Aligned AgNW          | 2014 | X                         | Red polymer (livlux), red                     | Random AgNW Roll-to-roll coating           | Al 100nm                                                                           | 400                                | -                                    | -                                   |
| [8]      |                       | 2022 | X                         | Alq <sub>3</sub> , green                      | Aligned AgNW microgrid EHD printing        | Al 100nm                                                                           | -                                  | 27.2 (at 92cd/m <sup>2</sup> )       | -                                   |
| [9]      | graphene              | 2015 | O                         | PVK:Firpic, blue                              | ITO                                        | CsF:graphene (transfer)                                                            | 1034                               | 3.1                                  | -                                   |
| [10]     |                       | 2025 | X                         | PVK:mCP:TXO-TPA, green TADF                   | Graphene                                   | Al 100 nm                                                                          | 920                                | -                                    | 1.20                                |
| [11]     | Evaporated metal mesh | 2020 | X                         | MEH-PPV:PFO, white                            | Evaporated metal mesh Au/Ag, crack-based   | Al 150nm                                                                           | -                                  | 4.3                                  | -                                   |
| [12]     |                       | 2022 | X                         | Alq <sub>3</sub> , green                      | Evaporated metal mesh Cu, crack-based      | Al 100nm                                                                           | 1587                               | 0.8                                  | -                                   |
| [13]     | Printed metal mesh    | 2023 | O                         | PO-01, red Firpic, sky blue (white)           | <b>Embedded mesh</b> AgNP, inkjet printing | Thin metal film Al/Ag                                                              | 8343 (bottom)                      | 16.5 (bottom)                        | -                                   |
| [14]     |                       | 2017 | O                         | (Ir(ppy) <sub>2</sub> (m-bppy)):PGH02, yellow | ITO                                        | <b>Embedded mesh (lamination)</b> Ag ink paste, PEDOT:PSS gravure off-set printing | 2880 (bottom)<br>3263 (top)        | 24.5 (bottom)<br>25.8 (top)          | 7.9 (bottom)<br>7.4 (top)           |
| Our work | Evaporated metal mesh | 2025 | O                         | CBP:Ir(ppy) <sub>3</sub> , green              | ITO                                        | Evaporated Metal mesh                                                              | 1963-4224 (bottom)<br>92-267 (top) | 9.7-14.2 (bottom)<br>0.59-0.92 (top) | 2.9-4.2 (bottom)<br>0.17-0.26 (top) |

## References

- [1] D. Yin, Z.-Y. Chen, N.-R. Jiang, Y.-F. Liu, Y.-G. Bi, X.-L. Zhang, W. Han, J. Feng and H.-B. Sun, *Org. Electron.*, 2020, **76**, 105494.
- [2] E.-y. Choi, S.-C. Kang, K. Kim, S.-H. Lee, J.-B. Kim and J.-K. Song, *Light Sci. Appl.*, 2025, **14**, 62.
- [3] M. Kim, C. Lim, D. Jeong, H.-S. Nam, J. Kim and J. Lee, *Org. Electron.*, 2016, **36**, 61-67.
- [4] K.-H. Choi, H.-J. Nam, J.-A. Jeong, S.-W. Cho, H.-K. Kim, J.-W. Kang, D.-G. Kim and W.-J. Cho, *Appl. Phys. Lett.*, 2008, **92**, 223302.
- [5] S. Kee, N. Kim, B. Park, B. S. Kim, S. Hong, J.-H. Lee, S. Jeong, A. Kim, S.-Y. Jang and K. Lee, *Adv. Mater.*, 2018, **30**, 1703437.

- [6] M. Zhang, S. Höfle, J. Czolk, A. Mertens and A. Colsmann, *Nanoscale*, 2015, **7**, 20009-20014.
- [7] R. E. Triambulo, H.-G. Cheong and J.-W. Park, *Org. Electron.*, 2014, **15**, 2685-2695.
- [8] X. Feng, L. Wang, Y. Y. S. Huang, Y. Luo, J. Ba, H. H. Shi, Y. Pei, S. Zhang, Z. Zhang, X. Jia and B. Lu, *ACS Appl. Mater. Interfaces*, 2022, **14**, 39199-39210.
- [9] J.-H. Chang, W.-H. Lin, P.-C. Wang, J.-I. Taur, T.-A. Ku, W.-T. Chen, S.-J. Yan and C.-I. Wu, *Sci. Rep.*, 2015, **5**, 9693.
- [10] B. Kulyk, J. C. Germino, D. Gaspar, A. J. S. Fernandes, J. Deuermeier, A. F. Carvalho, A. F. da Cunha, L. M. N. Pereira, L. Pereira and F. M. Costa, *J. Mater. Chem. C*, 2025, **13**, 5855-5864.
- [11] X. Huang, F. Zhang, Y. Liu and J. Leng, *ACS Appl. Mater. Interfaces*, 2020, **12**, 23236-23243.
- [12] P. Liu, B. Huang, L. Peng, L. Liu, Q. Gao and Y. Wang, *Sci. Rep.*, 2022, **12**, 20494.
- [13] L.-Q. Yao, Y. Qin, X.-C. Li, Q. Xue, F. Liu, T. Cheng, G.-J. Li, X. Zhang and W.-Y. Lai, *InfoMat*, 2023, **5**, e12410.
- [14] S. Park, J. T. Lim, W.-Y. Jin, H. Lee, B.-H. Kwon, N. S. Cho, J.-H. Han, J.-W. Kang, S. Yoo and J.-I. Lee, *ACS Photonics*, 2017, **4**, 1114-1122.

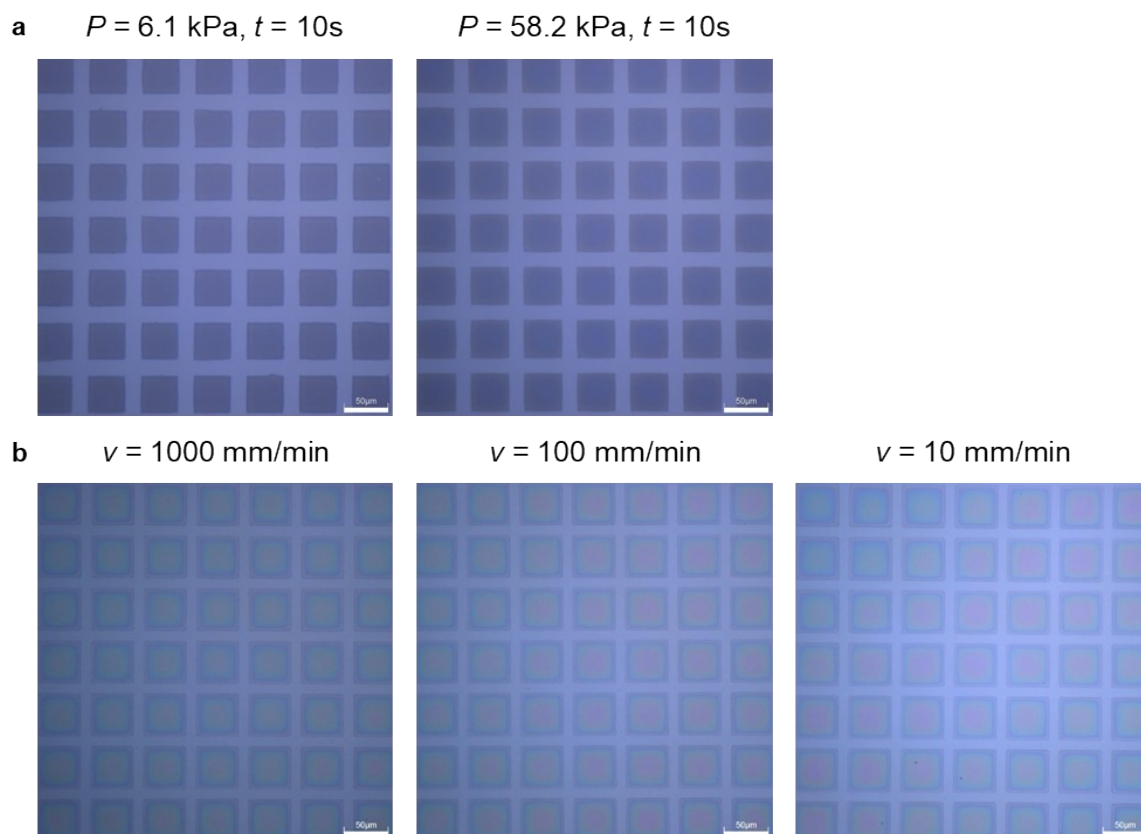

Figure S20. Optical images of transferred e-PVDF-HFP patterns on glass, (a) with different pressure ( $P$ ) applied during the pressing period ( $t$ ) of the transfer printing process, or (b) different releasing speeds ( $v$ ), using an automatic stage. (Ink concentration: 5 wt% for (a), 10 wt% for (b))
